# Supplementary material for: Heavy Lifetime Cannabis Use and Mortality by Sex
Source: PubMed Central journal article supplement (PMC11157356; doi:10.1001/jamanetworkopen.2024.15227), 2024-06-06
Supplement: jamanetwopen-e2415227-s001.pdf [file jamanetwopen-e2415227-s001.pdf]

## Supplementary Online Content

Vallée A. Heavy lifetime cannabis use and mortality by sex. *JAMA Netw Open*. 2024;7(6):e2415227. doi:10.1001/jamanetworkopen.2024.15227

**eTable 1.** Cox Proportional Hazards Regression Among Males for the Association With All-Cause Mortality

**eTable 2.** Cox Proportional Hazards Regression Among Females for the Association With All-Cause Mortality

**eTable 3.** Fully Adjusted Sex-Stratified Cox Proportional Hazards Regression Models for All-Cause, CVD, and Cancer Mortality According to BMI Level

**eTable 4.** Fully Adjusted Sex-Stratified Cox Proportional Hazards Regression Models for All-Cause, CVD, and Cancer Mortality According to Hypertension Status

**eTable 5.** Fully Adjusted Sex-Stratified Cox Proportional Hazards Regression Models for All-Cause, CVD, and Cancer Mortality According to Diabetes Status

This supplementary material has been provided by the authors to give readers additional information about their work.

eTable 1: Cox proportional hazards regression among males for the association with all-cause mortality

| Parameters         | Univariable HR        | Multivariable HR      |
|--------------------|-----------------------|-----------------------|
| Age                | 1.11 [1.10-1.12]      | 1.10 [1.09 – 1.11]    |
| CV disease         | 2.71 [2.33-3.16]      | 1.38 [1.16 – 1.65]    |
| BMI                |                       |                       |
| High               | 1.64 [1.41-1.89]      | 1.24 [1.05 – 1.47]    |
| Moderate           | 1.12 [0.98 – 1.27]    | 0.96 [0.83 – 1.12]    |
| Low                | Ref.                  | Ref.                  |
| Income             |                       |                       |
| High               | 0.31 [0.27 – 0.37]    | 0.65 [0.54 – 0.79]    |
| Moderate           | 0.57 [0.50 – 0.66]    | 0.73 [0.63 – 0.86]    |
| Low                | Ref.                  | Ref.                  |
| Education          |                       |                       |
| High               | 0.67 [0.57 – 0.79]    | 1.11 [0.91 – 1.34]    |
| Moderate           | 0.82 [0.70 – 0.97]    | 1.08 [0.90 – 1.29]    |
| Low                | Ref.                  | Ref.                  |
| Alcohol            |                       |                       |
| Current            | 0.69 [0.50 - 0.97]    | 0.74 [0.52 – 1.05]    |
| Past               | 1.27 [0.84 – 1.92]    | 1.11 [0.72 – 1.73]    |
| Never              | Ref.                  | Ref.                  |
| Smoking Pack years | 1.019 [1.017 – 1.022] | 1.010 [1.008 – 1.013] |
| Hypertension       | 1.85 [1.65 – 2.07]    | 1.18 [1.03 – 1.34]    |
| Diabetes           | 2.28 [1.96 – 2.66]    | 1.44 [1.21 – 1.72]    |
| Dyslipidemia       | 1.45 [1.29 – 1.63]    | 1.00 [0.86 – 1.14]    |
| Antidepressant     | 1.61 [1.29 – 2.01]    | 1.41 [1.11 – 1.79]    |
| Cannabis           |                       |                       |
| Heavy              | 0.71 [0.52 – 0.96]    | 1.28 [0.90 – 1.81]    |
| Moderate           | 0.59 [0.44 – 0.79]    | 0.97 [0.70 – 1.36]    |
| Low                | 0.64 [0.55 – 0.76]    | 0.88 [0.72 – 1.07]    |
| Never              | Ref.                  | Ref.                  |

eTable 2: Cox proportional hazards regression among females for the association with all-cause mortality

| Parameters         | Univariable HR        | Multivariable HR      |
|--------------------|-----------------------|-----------------------|
| Age                | 1.09 [1.08-1.10]      | 1.08 [1.07 – 1.09]    |
| CV disease         | 2.29 [1.66 – 3.17]    | 0.97 [0.66 – 1.42]    |
| BMI                |                       |                       |
| High               | 1.61 [1.38-1.89]      | 1.11 [0.92 – 1.33]    |
| Moderate           | 1.05 [0.91 – 1.22]    | 0.82 [0.70 – 0.97]    |
| Low                | Ref.                  | Ref.                  |
| Income             |                       |                       |
| High               | 0.45 [0.37 – 0.54]    | 0.87 [0.69 – 1.09]    |
| Moderate           | 0.64 [0.55 – 0.75]    | 0.89 [0.75 – 1.05]    |
| Low                | Ref.                  | Ref.                  |
| Education          |                       |                       |
| High               | 0.78 [0.63 – 0.95]    | 1.19 [0.94 1.51]      |
| Moderate           | 0.79 [0.64 – 0.97]    | 1.00 [0.80 – 1.26]    |
| Low                | Ref.                  | Ref.                  |
| Alcohol            |                       |                       |
| Current            | 0.58 [0.44 – 0.77]    | 0.71 [0.53 – 0.96]    |
| Past               | 1.04 [0.70 - 1.56]    | 0.94 [0.61 – 1.46]    |
| Never              | Ref.                  | Ref.                  |
| Smoking Pack years | 1.025 [1.020 – 1.029] | 1.017 [1.013 – 1.022] |
| Hypertension       | 1.81 [1.59 – 2.06]    | 1.17 [1.01 – 1.35]    |
| Diabetes           | 2.27 [1.81 – 2.85]    | 1.61 [1.26 – 2.07]    |
| Dyslipidemia       | 1.81 [1.59 – 2.06]    | 1.17 [1.00 – 1.35]    |
| Antidepressant     | 1.26 [1.01 – 1.56]    | 1.19 [0.94 – 1.51]    |
| Cannabis           |                       |                       |
| Heavy              | 1.11 [0.72 – 1.71]    | 1.49 [0.92 – 2.40]    |
| Moderate           | 0.77 [0.53 – 1.09]    | 1.07 [0.72 – 1.60]    |
| Low                | 0.83 [0.69 – 1.01]    | 1.07 [0.87 – 1.33]    |
| Never              | Ref.                  | Ref.                  |

eTable 3: Fully adjusted sex-stratified Cox proportional hazards regression models for all-cause, CVD and cancer mortality according to the status of BMI level.

| Males        |                           |                     |                           |
|--------------|---------------------------|---------------------|---------------------------|
|              | All-cause mortality       | CVD mortality       | Cancer mortality          |
| Obese        |                           |                     |                           |
| Cannabis use | HR 95% CI                 | HR 95% CI           | HR 95% CI                 |
| Heavy        | 1.51 [0.83 – 2.73]        | 0.52 [0.07 – 3.81]  | 0.87 [0.27 – 2.76]        |
| Moderate     | 1.15 [0.64 – 2.05]        | 0.36 [0.06 – 2.63]  | 1.72 [0.86 – 3.45]        |
| Low          | 1.09 [0.71 – 1.68]        | 0.55 [0.24 – 1.28]  | 1.17 [0.74 – 1.83]        |
| Never        | Ref.                      | Ref.                | Ref.                      |
| overweight   |                           |                     |                           |
| Cannabis use | HR 95% CI                 | HR 95% CI           | HR 95% CI                 |
| Heavy        | 1.25 [0.75 – 2.08]        | 1.06 [0.32 – 3.43]  | 0.88 [0.39 – 2.02]        |
| Moderate     | 0.78 [0.46 – 1.30]        | 0.47 [0.11 – 1.91]  | 0.85 [0.44 – 1.69]        |
| Low          | 0.95 [0.72 – 1.25]        | 0.86 [0.48 – 1.52]  | 0.70 [0.46 – 1.05]        |
| Never        | Ref.                      | Ref.                | Ref.                      |
| Normal BMI   |                           |                     |                           |
| Cannabis use | HR 95% CI                 | HR 95% CI           | HR 95% CI                 |
| Heavy        | 0.85 [0.21 – 3.43]        | 1.18 [0.27 – 5.20]  | 1.09 [0.46 – 2.58]        |
| Moderate     | 0.85 [0.40 – 1.80]        | 1.99 [0.66 – 5.97]  | 0.82 [0.33 – 2.06]        |
| Low          | 0.83 [0.43 – 1.91]        | 0.78 [0.30 – 2.03]  | 1.17 [0.74 – 1.84]        |
| Never        | Ref.                      | Ref.                | Ref.                      |
| Females      |                           |                     |                           |
|              | All-cause mortality       | CVD mortality       | Cancer mortality          |
| obese        |                           |                     |                           |
| Cannabis use | HR 95% CI                 | HR 95% CI           | HR 95% CI                 |
| Heavy        | 0.79 [0.19 – 3.21]        | 2.82 [0.36 – 18.38] | 0.67 [0.09 – 4.91]        |
| Moderate     | 1.35 [0.65 – 2.81]        | 3.35 [0.94 – 11.89] | 1.14 [0.40 – 3.16]        |
| Low          | 1.06 [0.69 – 1.64]        | 0.56 [0.13 – 2.45]  | 1.32 [0.78 – 2.20]        |
| Never        | Ref.                      | Ref.                | Ref.                      |
| overweight   |                           |                     |                           |
| Cannabis use | HR 95% CI                 | HR 95% CI           | HR 95% CI                 |
| <b>Heavy</b> | <b>2.23 [1.11 – 4.45]</b> | 2.74 [0.34 – 16.90] | <b>2.79 [1.32 – 5.88]</b> |
| Moderate     | 1.12 [0.54 – 2.30]        | 3.40 [0.74 – 15.63] | 0.59 [0.18 – 1.87]        |
| Low          | 1.05 [0.72 – 1.54]        | 1.39 [0.46 – 4.19]  | 1.18 [0.77 – 1.84]        |
| Never        | Ref.                      | Ref.                | Ref.                      |
| Normal BMI   |                           |                     |                           |
| Cannabis use | HR 95% CI                 | HR 95% CI           | HR 95% CI                 |
| Heavy        | 1.19 [0.55 – 2.55]        | 1.53 [0.20 – 11.72] | 1.01 [0.37 – 2.77]        |
| Moderate     | 1.09 [0.78 – 1.51]        | 1.85 [0.42 – 8.17]  | 1.05 [0.51 – 2.17]        |
| Low          | 0.89 [0.47 – 1.71]        | 0.96 [0.32 – 2.81]  | 1.14 [0.77 – 1.68]        |
| Never        | Ref.                      | Ref.                | Ref.                      |

eTable 4: Fully adjusted sex-stratified Cox proportional hazards regression models for all-cause, CVD, and cancer mortality according to hypertension status.

| Males           |                           |                     |                           |
|-----------------|---------------------------|---------------------|---------------------------|
|                 | All-cause mortality       | CVD mortality       | Cancer mortality          |
| Hypertension    |                           |                     |                           |
| Cannabis use    | HR 95% CI                 | HR 95% CI           | HR 95% CI                 |
| Heavy           | <b>1.52 [1.01 – 2.32]</b> | 1.38 [0.60 – 3.18]  | 1.21 [0.61 – 2.39]        |
| Moderate        | 1.11 [0.73 – 1.66]        | 0.91 [0.40 – 2.10]  | 1.17 [0.66 – 2.07]        |
| Low             | 0.95 [0.76 – 1.19]        | 0.73 [0.45 – 1.19]  | 1.11 [0.82 – 1.51]        |
| Never           | Ref.                      | Ref.                | Ref.                      |
| no Hypertension |                           |                     |                           |
| Cannabis use    | HR 95% CI                 | HR 95% CI           | HR 95% CI                 |
| Heavy           | 0.92 [0.50 – 1.72]        | -                   | 0.88 [0.39 – 2.02]        |
| Moderate        | 0.76 [0.42 – 1.36]        | 0.45 [0.06 – 3.32]  | 0.85 [0.44 – 1.69]        |
| Low             | 0.75 [0.53 – 1.06]        | 0.78 [0.32 – 1.88]  | 0.70 [0.46 – 1.05]        |
| Never           | Ref.                      | Ref.                | Ref.                      |
| Females         |                           |                     |                           |
|                 | All-cause mortality       | CVD mortality       | Cancer mortality          |
| Hypertension    |                           |                     |                           |
| Cannabis use    | HR 95% CI                 | HR 95% CI           | HR 95% CI                 |
| Heavy           | 0.24 [0.03 – 1.74]        | 1.60 [0.21 – 11.94] | -                         |
| Moderate        | 1.09 [0.56 – 2.15]        | 2.65 [0.79 – 8.86]  | 0.58 [0.19 – 1.86]        |
| Low             | 1.04 [0.74 – 1.48]        | 1.29 [0.57 – 2.94]  | 1.13 [0.73 – 1.72]        |
| Never           | Ref.                      | Ref.                | Ref.                      |
| no Hypertension |                           |                     |                           |
| Cannabis use    | HR 95% CI                 | HR 95% CI           | HR 95% CI                 |
| Heavy           | <b>2.14 [1.29 – 3.54]</b> | 2.71 [0.61 – 12.17] | <b>2.43 [1.36 – 4.32]</b> |
| Moderate        | 1.06 [0.65 – 1.76]        | 2.67 [0.88 – 8.11]  | 1.11 [0.61 – 2.01]        |
| Low             | 1.09 [0.83 – 1.44]        | 0.56 [0.17 – 1.91]  | 1.26 [0.92 – 1.73]        |
| Never           | Ref.                      | Ref.                | Ref.                      |

eTable 5: Fully adjusted sex-stratified Cox proportional hazards regression models for all-cause, CVD and cancer mortality according to diabetes status.

| Males        |                     |                           |                     |
|--------------|---------------------|---------------------------|---------------------|
|              | All-cause mortality | CVD mortality             | Cancer mortality    |
| Diabetes     |                     |                           |                     |
| Cannabis use | HR 95% CI           | HR 95% CI                 | HR 95% CI           |
| Heavy        | 1.42 [0.57 – 3.57]  | 1.78 [0.40 – 7.87]        | 1.63 [0.38 – 6.99]  |
| Moderate     | 0.85 [0.27 – 2.71]  | 0.91 [0.12 – 6.88]        | -                   |
| Low          | 1.10 [0.68 – 1.79]  | 0.56 [0.17 – 1.85]        | 1.24 [0.60 – 2.56]  |
| Never        | Ref.                | Ref.                      | Ref.                |
| no Diabetes  |                     |                           |                     |
| Cannabis use | HR 95% CI           | HR 95% CI                 | HR 95% CI           |
| Heavy        | 1.21 [0.83 – 1.77]  | 0.76 [0.28 – 3.09]        | 0.93 [0.53 – 1.65]  |
| Moderate     | 0.97 [0.68 – 1.37]  | 0.78 [0.34 – 1.79]        | 1.15 [0.75 – 1.77]  |
| Low          | 0.83 [0.68 – 1.03]  | 0.77 [0.49 – 1.21]        | 0.90 [0.79 – 1.19]  |
| Never        | Ref.                | Ref.                      | Ref.                |
| Females      |                     |                           |                     |
|              | All-cause mortality | CVD mortality             | Cancer mortality    |
| Diabetes     |                     |                           |                     |
| Cannabis use | HR 95% CI           | HR 95% CI                 | HR 95% CI           |
| Heavy        | 2.20 [0.49 – 9.93]  | 4.68 [0.46 – 17.74]       | 2.69 [0.32 – 10.92] |
| Moderate     | 0.88 [0.21 – 3.73]  | 1.88 [0.23 – 15.41]       | 1.01 [0.13 – 7.80]  |
| Low          | 0.95 [0.43 – 2.16]  | -                         | 1.57 [0.57 – 4.30]  |
| Never        | Ref.                | Ref.                      | Ref.                |
| no Diabetes  |                     |                           |                     |
| Cannabis use | HR 95% CI           | HR 95% CI                 | HR 95% CI           |
| Heavy        | 1.42 [0.86 – 2.37]  | <b>2.92 [1.21 – 7.05]</b> | 1.56 [0.87 – 2.81]  |
| Moderate     | 1.09 [0.72 – 1.65]  | 1.75 [0.42 – 6.47]        | 0.92 [0.53 – 1.58]  |
| Low          | 1.08 [0.87 – 1.36]  | 1.17 [0.59 – 2.33]        | 1.18 [0.90 – 1.53]  |
| Never        | Ref.                | Ref.                      | Ref.                |
