# Supplementary material for: Heavy Lifetime Cannabis Use and Mortality by Sex
Source: PubMed Central journal article supplement (PMC11157356; doi:10.1001/jamanetworkopen.2024.15227), 2024-06-06
Supplement: jamanetwopen-e2415227-s002.pdf [file jamanetwopen-e2415227-s002.pdf]

## Data Sharing Statement

Vallée. Heavy Lifetime Cannabis Use and Mortality by Sex. *JAMA Netw Open*. Published June 06, 2024. doi:10.1001/jamanetworkopen.2024.15227

### Data

**Data available:** No

### Additional Information

**Explanation for why data not available:** UK Biobank data are available through the UK Biobank Access Management System (UK Biobank Access Management System: <http://www.ukbiobank.ac.uk/register-apply/>).
